# Supplementary material
Source: HighWire-hosted journal article supplement (https://rmdopen.bmj.com/content/6/1/e001096)
Supplement: inline-supplementary-material-1 [file inline-supplementary-material-1.pdf]

## Supplementary materials

### A Pooled Analysis of TNF Inhibitor Biosimilar Studies Comparing Radiographic Progression by Disease Activity States in Rheumatoid Arthritis

**Supplementary Table 1.** Disease activity cut-off values

| Disease activity measure | Remission  | LDA                  | MDA                      | HDA    |
|--------------------------|------------|----------------------|--------------------------|--------|
| <b>DAS28 (ESR)</b>       | < 2.6      | $\geq 2.6$ to < 3.2  | $\geq 3.2$ to $\leq 5.1$ | > 5.1  |
| <b>SDAI</b>              | $\leq 3.3$ | > 3.3 to $\leq 11.0$ | > 11.0 to $\leq 26.0$    | > 26.0 |
| <b>CDAI</b>              | $\leq 2.8$ | > 2.8 to $\leq 10.0$ | > 10.0 to $\leq 22.0$    | > 22.0 |

CDAI, Clinical Disease Activity Index; DAS28, disease activity score based on 28-joint count; ESR, erythrocyte sedimentation rate; HDA, high disease activity; LDA, low disease activity; MDA, moderate disease activity; SDAI, Simplified Disease Activity Index.

**Supplementary Table 2.** Number of patients in each disease activity measure in all treatments combined group.

| Disease activity measure | Remission  |            | LDA        |            | MDA        |            | HDA        |            |
|--------------------------|------------|------------|------------|------------|------------|------------|------------|------------|
|                          | Week 12/14 | Week 24/30 |
| <b>DAS28 (ESR)</b>       | 141        | 228        | 152        | 160        | 652        | 638        | 315        | 238        |
| <b>SDAI</b>              | 86         | 144        | 377        | 440        | 558        | 507        | 234        | 170        |
| <b>CDAI</b>              | 80         | 140        | 356        | 422        | 481        | 467        | 343        | 236        |

CDAI, Clinical Disease Activity Index; DAS28, disease activity score based on 28-joint count; HDA, high disease activity; LDA, low disease activity; MDA, moderate disease activity; SDAI, Simplified Disease Activity Index.

**Supplementary Table 3** Change in mTSS at 1 year and proportion of patients with no rapid radiographic progression (1-year mean change in mTSS  $\leq 1$  or  $\leq 5$ ) stratified by baseline mTSS score ( $\leq 5$  versus  $> 5$ ) in all treatments combined group

|                                                                                                       | Baseline mTSS score $\leq 5$ |                   |                     |                  | Baseline mTSS score $> 5$ |                   |                    |                    |
|-------------------------------------------------------------------------------------------------------|------------------------------|-------------------|---------------------|------------------|---------------------------|-------------------|--------------------|--------------------|
|                                                                                                       | DAS28 at Week 24/30          |                   |                     |                  | DAS28 at Week 24/30       |                   |                    |                    |
|                                                                                                       | Remission                    | LDA               | MDA                 | HDA              | Remission                 | LDA               | MDA                | HDA                |
| Change in mTSS at 1 year<br>Mean (SD)                                                                 | 0.10<br>(0.61)               | -0.02<br>(0.29)   | 0.06<br>(0.61)      | 0.18<br>(0.71)   | -0.04<br>(2.77)           | 0.59<br>(2.65)    | 0.38<br>(2.72)     | 1.61<br>(4.98)     |
| % of patients with no rapid radiographic progression (change in mTSS at 1 year $\leq 1$ )<br>n/n' (%) | 98 /103<br>(95.1)            | 56 /56<br>(100.0) | 218 /225<br>(96.9)  | 49 /56<br>(87.5) | 105 /125<br>(84.0)        | 81 /104<br>(77.9) | 329 /413<br>(79.7) | 124 /182<br>(68.1) |
| % of patients with no rapid radiographic progression (change in mTSS at 1 year $\leq 5$ )<br>n/n' (%) | 103 /103<br>(100.0)          | 56/56<br>(100.0)  | 225 /225<br>(100.0) | 56/56<br>(100.0) | 120 /125<br>(96.0)        | 98 /104<br>(94.2) | 396 /413<br>(95.9) | 161 /182<br>(88.5) |

N: Patients who completed Week 52 or 54 and have available mTSS data both at baseline and Week 52 or 54; n: number of patients within the category; n': number of patients with available assessment at each timepoint

DAS28, disease activity score based on 28-joint count; HDA, high disease activity; LDA, low disease activity; MDA, moderate disease activity; mTSS, modified Total sharp Score.

**Supplementary Table 4.** HAQ-DI, PhGA, and PGA score at Week 52/54 by disease activity status at Week 24/30

| Disease activity measure | DAS28       |              |              | SDAI        |              |              | CDAI        |              |              |
|--------------------------|-------------|--------------|--------------|-------------|--------------|--------------|-------------|--------------|--------------|
|                          | HAQ-DI      | PhGA         | PGA          | HAQ-DI      | PhGA         | PGA          | HAQ-DI      | PhGA         | PGA          |
| <b>Remission</b>         | 0.44 (0.52) | 9.3 (9.45)   | 15.5 (15.48) | 0.36 (0.51) | 6.8 (7.35)   | 9.7 (11.57)  | 0.31 (0.46) | 6.8 (8.05)   | 9.4 (12.87)  |
| <b>LDA</b>               | 0.58 (0.54) | 14.9 (13.69) | 23.2 (20.84) | 0.62 (0.54) | 14.7 (12.77) | 23.1 (17.95) | 0.64 (0.55) | 14.4 (12.72) | 22.9 (17.76) |
| <b>MDA</b>               | 0.88 (0.60) | 21.7 (14.84) | 32.2 (20.94) | 1.02 (0.59) | 25.7 (15.30) | 37.8 (21.07) | 0.97 (0.59) | 24.6 (14.83) | 36.6 (21.09) |
| <b>HDA</b>               | 1.26 (0.57) | 35.7 (18.53) | 45.5 (19.69) | 1.27 (0.61) | 37.5 (18.79) | 46.5 (19.65) | 1.23 (0.60) | 25.4 (18.48) | 44.7 (20.16) |

CDAI, Clinical Disease Activity Index; DAS28, disease activity score based on 28-joint count; HAQ-DI, Health Assessment Questionnaire Disability Index; HDA, high disease activity; LDA, low disease activity; MDA, moderate disease activity; PGA, Patient Global Assessment Score; PhGA, Physician Global Assessment Score; SDAI, Simplified Disease Activity Index.

**Supplementary Figure 1.** Odds ratios of radiographic non-progressors in reference to remission by disease activity score based on 28-joint count (per erythrocyte sedimentation rate) at (A) week 24/30 and (B) 12/14 in different combinations of treatment groups.

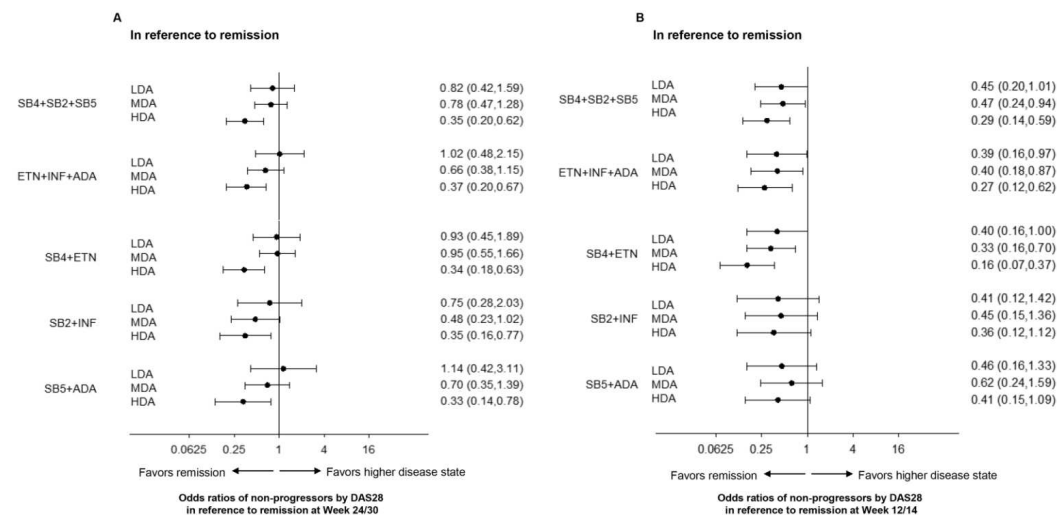

ADA, adalimumab reference product; DAS28, disease activity score based on 28-joint count (per erythrocyte sedimentation rate); ETN, etanercept reference product; HDA, high disease activity; INF, infliximab reference product; LDA, low disease activity; MDA, moderate disease activity; OR, odds ratio.

**Supplementary Figure 2A .** Odds ratios of radiographic non-progressors in reference to remission by SDAI scores and CDAI scores at week 24/30.

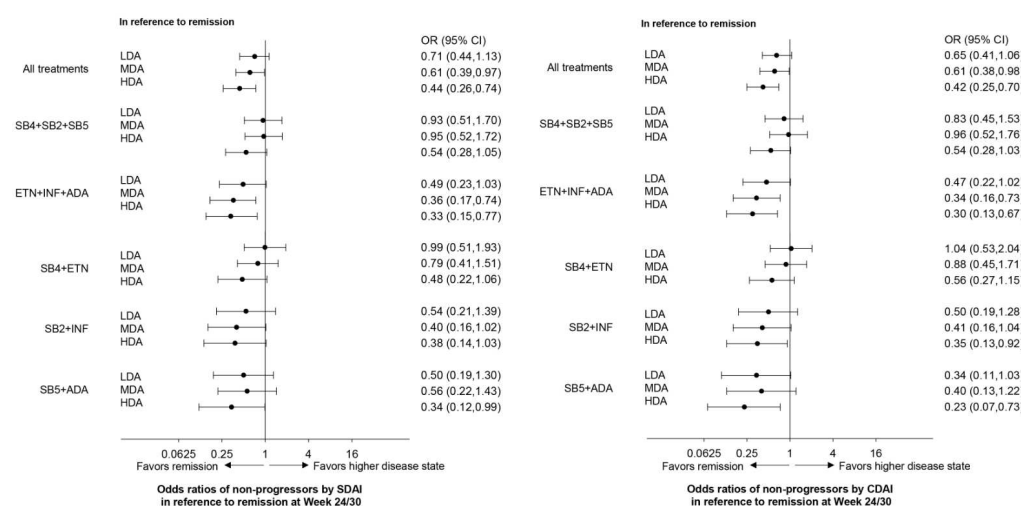

ADA, adalimumab reference product; CDAI, Clinical Disease Activity Index; CI, confidence interval; ETN, etanercept reference product; HDA, high disease activity; INF, infliximab reference product; LDA, low disease activity; MDA, moderate disease activity; OR, odds ratio; SDAI, Simplified Disease Activity Index.

**Supplementary Figure 2B.** Odds ratios of radiographic non-progressors in reference to remission by SDAI scores and CDAI scores at week 12/14.

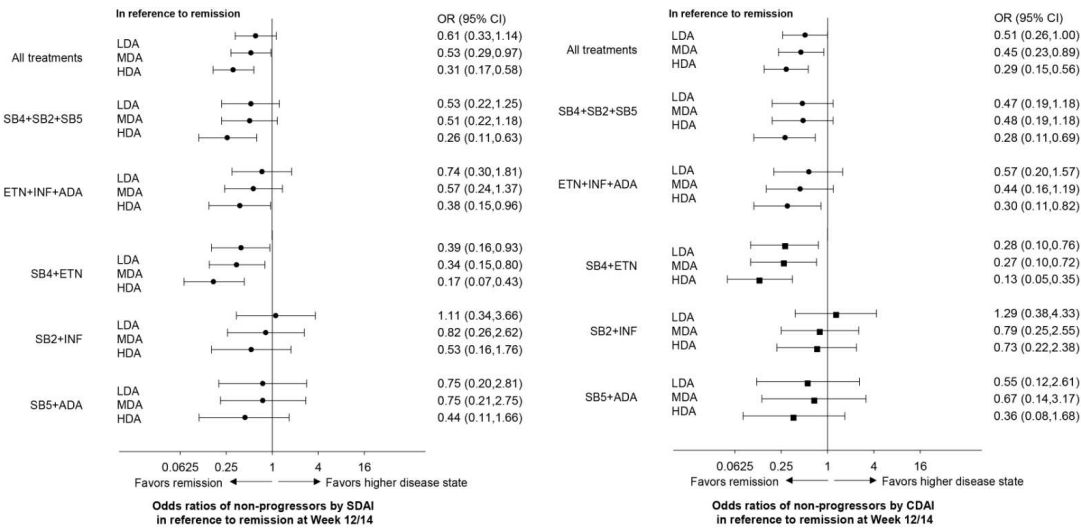

ADA, adalimumab reference product; CDAI, Clinical Disease Activity Index; CI, confidence interval; ETN, etanercept reference product; HDA, high disease activity; INF, infliximab reference product; LDA, low disease activity; MDA, moderate disease activity; OR, odds ratio; SDAI, Simplified Disease Activity Index.
